# Supplementary material
Source: PubMed Central journal article supplement (PMC7735164)
Supplement: bloodBLD2020006738-suppl1.pdf [file bloodBLD2020006738-suppl1.pdf]

**Supplementary Table 1. Demographics of patients with CD27 and CD70 deficiency undergoing hematopoietic stem cell transplantation**

|                                                                                                                                                                                                                                                                |                                                                                     |
|----------------------------------------------------------------------------------------------------------------------------------------------------------------------------------------------------------------------------------------------------------------|-------------------------------------------------------------------------------------|
|                                                                                                                                                                                                                                                                | n=                                                                                  |
| Total number of HSCT <ul style="list-style-type: none"> <li>CD27</li> <li>CD70</li> </ul>                                                                                                                                                                      | 19 / 49 patients (39%) (1 Re-Tx)<br>11 / 33 patients (33%)<br>8 / 16 patients (50%) |
| Graft <ul style="list-style-type: none"> <li>cord blood (CB)</li> <li>bone marrow (BM)</li> <li>peripheral blood (PB)</li> </ul>                                                                                                                               | 3<br>8 (incl. 1 Re-Tx)<br>9                                                         |
| HLA match <ul style="list-style-type: none"> <li>MSD 10/10</li> <li>MRD 10/10</li> <li>10 / 10</li> <li>9 / 10</li> <li>8 / 10</li> <li>Haplo</li> </ul>                                                                                                       | 2<br>5<br>4<br>4<br>1<br>3                                                          |
| Conditioning regime <ul style="list-style-type: none"> <li>Bu, Cy</li> <li>Flu, Bu, TT</li> <li>Flu, Bu (MAC)</li> <li>Flu, Treo, TT</li> <li>Flu, Mel, TT</li> <li>Flu, Cy, TBI</li> <li>Flu, Treo</li> <li>Flu, Mel</li> <li>Flu, Cy</li> <li>Eto</li> </ul> | 1<br>3<br><br>5<br>1<br>1<br>1<br><br>5<br>1<br><br>1 (Re-Tx)<br>1                  |

Abbreviations: Flu: Fludarabine, Bu: Busulfan, Cy: Cyclophosphamide, Eto: Etoposide, TBI: Total body irradiation, Treo: Treosulfan

**Supplemental Table 2: Clinical features in CD27 and CD70 deficiency, individual manifestation numbers.**

|                               | CD27 n | %  | CD70 n | %  | Total n | %  |
|-------------------------------|--------|----|--------|----|---------|----|
| EBV positive (PCR or sero+ve) | 31     | 94 | 15     | 94 | 46      | 94 |
| respiratory infections        | 14     | 42 | 9      | 56 | 23      | 47 |
| meningitis, encephalitis      | 4      | 12 | 1      | 6  | 5       | 10 |
| sepsis                        | 3      | 9  | 0      | 0  | 3       | 6  |
| EBV infectious mononucleosis  | 12     | 36 | 6      | 38 | 18      | 37 |
| hypogammaglobulinemia         | 10     | 30 | 8      | 50 | 18      | 37 |
| soft tissue infections        | 4      | 12 | 0      | 0  | 4       | 8  |
| HLH                           | 9      | 27 | 0      | 0  | 9       | 18 |
| Hodgkin lymphoma              | 9      | 27 | 7      | 44 | 16      | 33 |
| Non-Hodgkin lymphoma          | 5      | 15 | 2      | 13 | 7       | 14 |
| LPD/CAEBV                     | 13     | 39 | 5      | 31 | 18      | 37 |
| arthritis                     | 5      | 15 | 1      | 6  | 6       | 12 |
| uveitis                       | 6      | 18 | 1      | 6  | 7       | 14 |
| vasculitis                    | 1      | 3  | 0      | 0  | 1       | 2  |
| recurrent fever               | 5      | 15 | 5      | 31 | 10      | 20 |
| stomatitis                    | 11     | 33 | 3      | 19 | 14      | 29 |
| none                          | 4      | 12 | 1      | 6  | 5       | 10 |
| autoinflammation              | 15     | 48 | 5      | 31 | 21      | 43 |
| malignancies                  | 12     | 36 | 9      | 56 | 21      | 43 |
| malignancies+HLH              | 22     | 67 | 13     | 81 | 35      | 71 |
| HLH w progression LPD         | 8      | 24 | 0      | 0  | 8       | 16 |
| 1st manifestation lymphoma    | 9      | 27 | 5      | 31 | 14      | 29 |
| 1st manifestation HLH         | 4      | 12 | 0      | 0  | 4       | 8  |
